# Supplementary figures and images for: The Bul1/2 Alpha-Arrestins Promote Ubiquitylation and Endocytosis of the Can1 Permease upon Cycloheximide-Induced TORC1-Hyperactivation
Source: MDPI journal article supplement (doi:10.3390/ijms221910208), 2021-09-22

Figure 3D

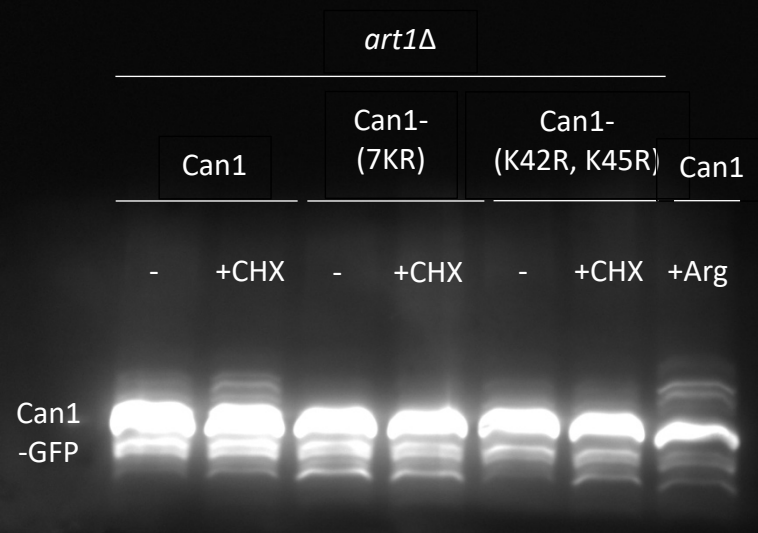

Figure 3D

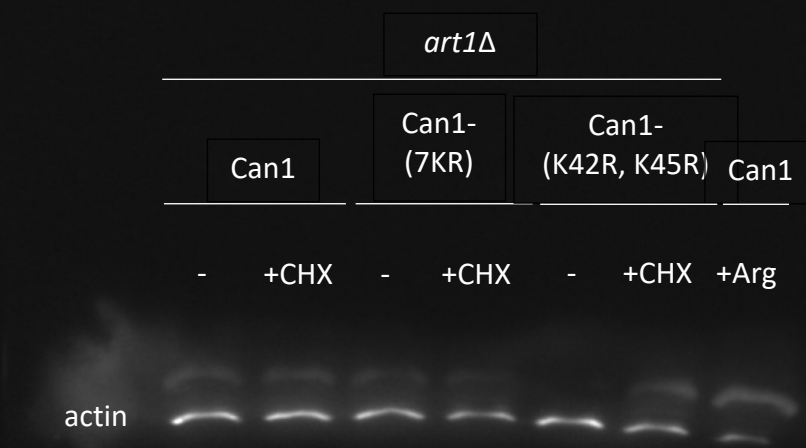

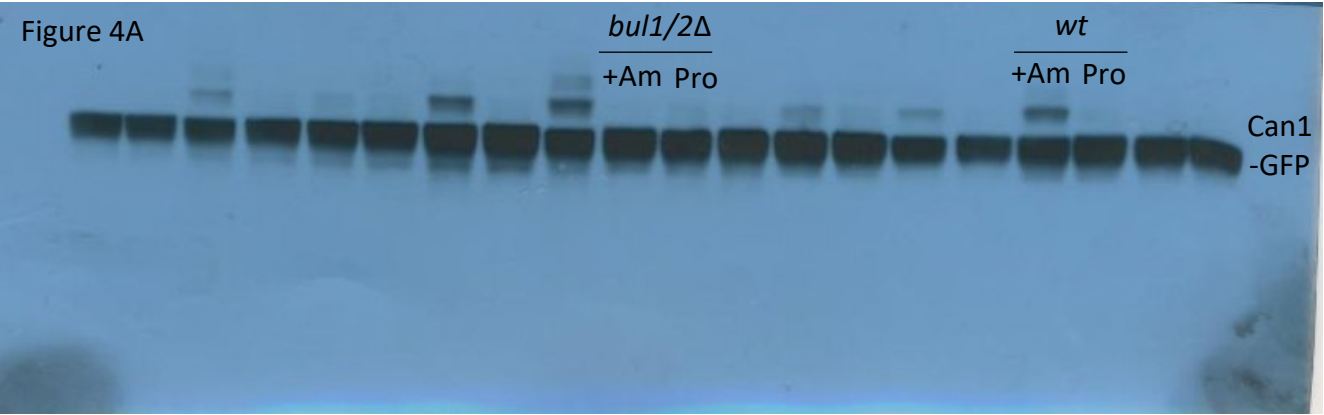

Figure 4B

|           | Pro | +Am |     |     |     |
|-----------|-----|-----|-----|-----|-----|
| time      | -   | 4'  | 15' | 30' | 30' |
| Rapamycin | -   | -   | -   | -   | +   |

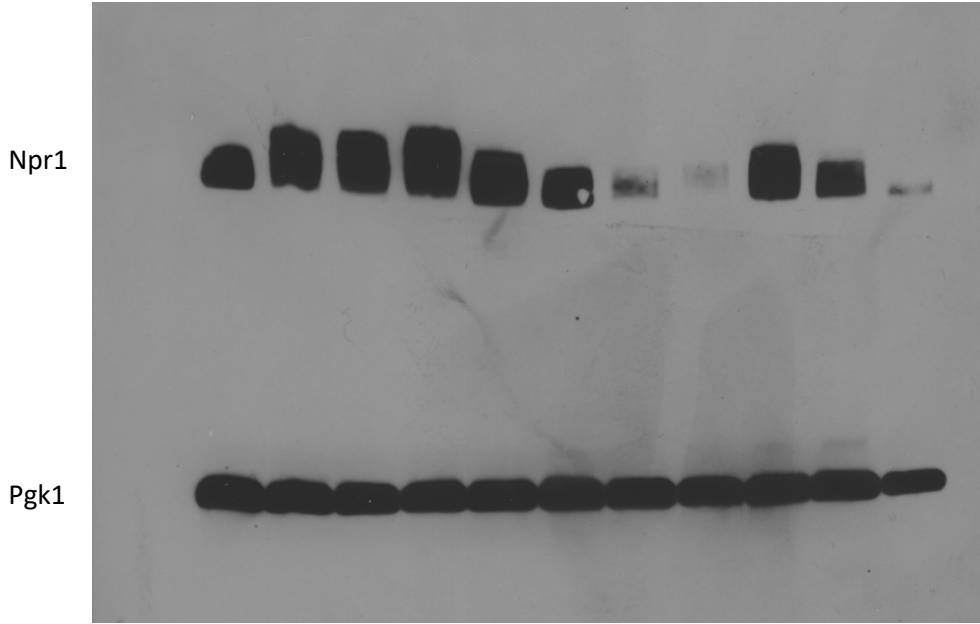

Figure 4C

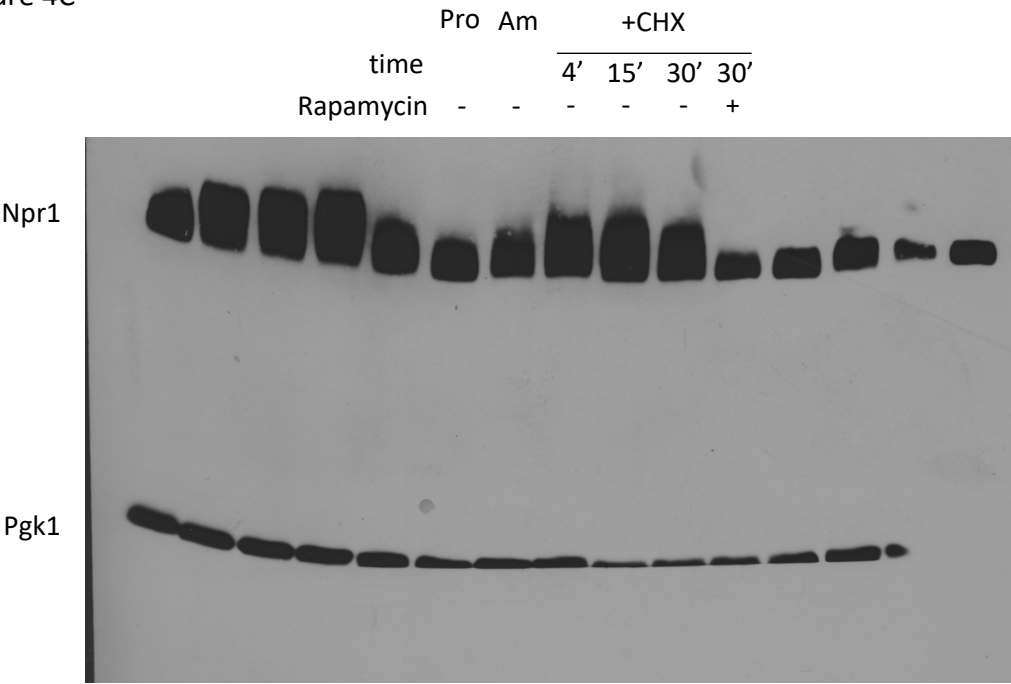

Supplement: s1 [file s1]
